# Supplementary material for: Inhibition of PIP4Kγ ameliorates the pathological effects of mutant huntingtin protein
Source: eLife journal article supplement (doi:10.7554/elife.29123), 2017-12-19
Supplement: supp [file elife_poa_e29123_Transparent_Reporting_File.docx]

***eLife’s* transparent reporting form**

We encourage authors to provide detailed information *within their submission* to facilitate the interpretation and replication of experiments. If you have any questions, please contact us: [editorial@elifesciences.org](mailto:editorial@elifesciences.org).

**Sample-size estimation**

- You should state whether an appropriate sample size was computed when the study was being designed
- You should state the statistical method of sample size computation and any required assumptions
- If no explicit power analysis was used, you should describe how you decided what sample (replicate) size (number) to use

Please outline where this information can be found within the submission (e.g., page numbers or figure legends), or explain why this information doesn’t apply to your submission:

Power calculations were not performed to design any studies in this manuscript; sample sizes (number of replicates) were selected based on historical performance of the assays presented. Statistical analysis is included to show whether observed effect sizes are significant.

**Replicates**

- You should report how often each experiment was performed
- You should include a definition of biological versus technical replication
- The data obtained should be provided and sufficient information should be provided to indicate the number of independent biological and/or technical replicates
- If you encountered any outliers, you should describe how these were handled
- Criteria for exclusion/inclusion of data should be clearly stated
- High-throughput sequence data should be uploaded before submission, with a private link for reviewers provided (these are available from both GEO and ArrayExpress)

Please outline where this information can be found within the submission (e.g., page numbers or figure legends), or explain why this information doesn’t apply to your submission:

Details on the number of replicates in each experiment accompany the data in the figure legends. No outliers were excluded from analysis (all recorded data were used) for all experimental data presented in this manuscript. No sequence data is included in this submission. Table 1 and its accompanying source data file are high-throughput screening data results without technical replicates, but select data was confirmed in concentration-response with replicates as noted in the table legend. Experimental data plotted with error bars in Figure 1 (incl suppl 1, suppl 2, suppl 3), Figure 2 (incl suppl 1), Figure 3, Figure 4, and Figure 5 indicate variation in measurements based on experimental replication. Accompanying blots and images in the figures and the figure supplements are included for the purposes of showing representative images of observed biological effect, and include replicate samples where it is convenient to show them.

**Statistical reporting**

- Statistical analysis methods should be described and justified
- Raw data should be presented in figures whenever informative to do so (typically when N per group is less than 10)
- For each experiment, you should identify the statistical tests used, exact values of N, definitions of center, methods of multiple test correction, and dispersion and precision measures (e.g., mean, median, SD, SEM, confidence intervals; and, for the major substantive results, a measure of effect size (e.g., Pearson's r, Cohen's d)
- Report exact p-values wherever possible alongside the summary statistics and 95% confidence intervals. These should be reported for all key questions and not only when the p-value is less than 0.05.

Where statistical analysis is used to compare effect size, methods and results are listed in the figure legends.

Please outline where this information can be found within the submission (e.g., page numbers or figure legends), or explain why this information doesn’t apply to your submission:

(For large datasets, or papers with a very large number of statistical tests, you may upload a single table file with tests, Ns, etc., with reference to page numbers in the manuscript.)

**Additional data files (“source data”)**

- We encourage you to upload relevant additional data files, such as numerical data that are represented as a graph in a figure, or as a summary table
- Where provided, these should be in the most useful format, and they can be uploaded as “Source data” files linked to a main figure or table
- Include model definition files including the full list of parameters used
- Include code used for data analysis (e.g., R, MatLab)
- Avoid stating that data files are “available upon request”

Please indicate the figures or tables for which source data files have been provided:

Full results from high-throughput kinome profiling is given in the table 1 source data file.
